# Supplementary material
Source: PubMed Central journal article supplement (PMC3890791)
Supplement: 1315854111_pnas.201315854SI.pdf [file 1315854111_pnas.201315854SI.pdf]

# Supporting Information

Hams et al. 10.1073/pnas.1315854111

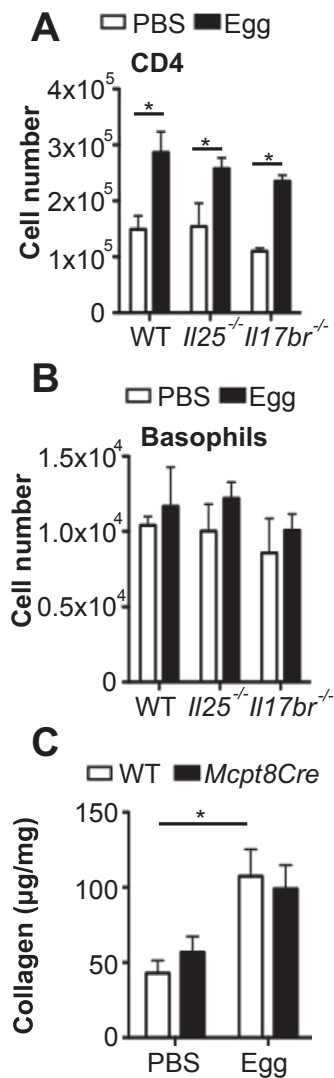

**Fig. S1.** Cellular infiltration into the lungs in response to *Schistosoma mansoni* egg challenge. Pulmonary granulomas were induced in WT, *Il25*<sup>-/-</sup> and *Il17br*<sup>-/-</sup> and *Mcpt8Cre* mice. Absolute numbers of CD4 cells (B220<sup>-</sup>CD4<sup>+</sup>) (A) and basophils (CD4<sup>-</sup>CD8<sup>-</sup>CD19<sup>-</sup>FcεR1<sup>+</sup>c-kit<sup>+</sup>IL-4<sup>+</sup>) (B) were quantified in the lung tissue of unchallenged mice and egg-challenged mice at day 7. (C) Total collagen in lung digests expressed per mg of lung protein for WT and basophil-depleted *Mcpt8Cre* mice. Data are representative of mean ± SEM ( $n = 2-6$ ) from two individual experimental replicates (\* $P < 0.05$ ).

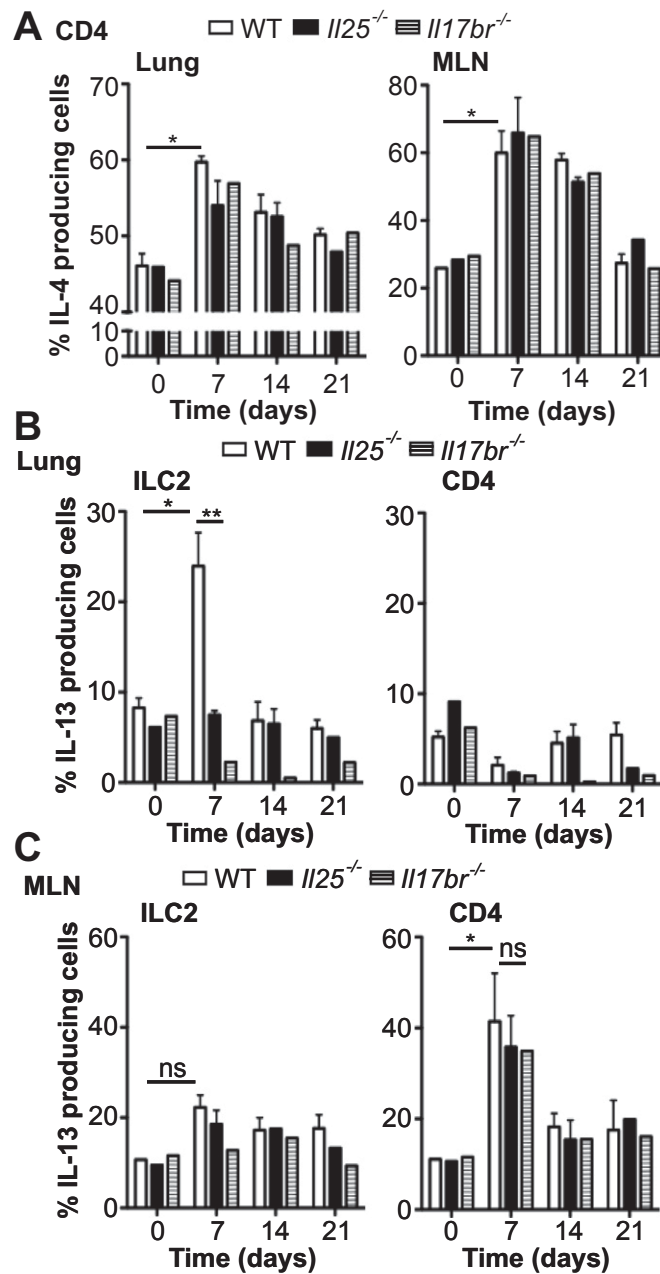

**Fig. S2.** Cytokine expression in the lungs and mediastinal lymph nodes (MLN) in response to *S. mansoni* egg challenge. Pulmonary granulomas were induced in WT *Il25*<sup>-/-</sup>, and *Il17br*<sup>-/-</sup> deficient mice. (A) The proportion of IL-4<sup>+</sup>CD4<sup>+</sup> T cells in the lung and MLN was quantified at days 0, 7, 14, and 21. The percentage of IL-13<sup>+</sup>ILC2 (CD3<sup>-</sup>CD4<sup>-</sup>CD8<sup>-</sup>CD19<sup>-</sup>CD11b<sup>-</sup>CD11c<sup>-</sup>Gr-1<sup>-</sup>FcεR1<sup>-</sup>F4/80<sup>-</sup>IL-7Rα<sup>+</sup>Sca-1<sup>+</sup>) and IL-13<sup>+</sup>CD4<sup>+</sup> T cells in the lung (B) and MLN (C) of WT *Il25*<sup>-/-</sup> and *Il17br*<sup>-/-</sup> were quantified at days 0, 7, 14, and 21 postegg challenge. Data are representative of mean ± SEM (*n* = 2–3) from two individual experimental replicates (ns, not significant; \**P* < 0.05).

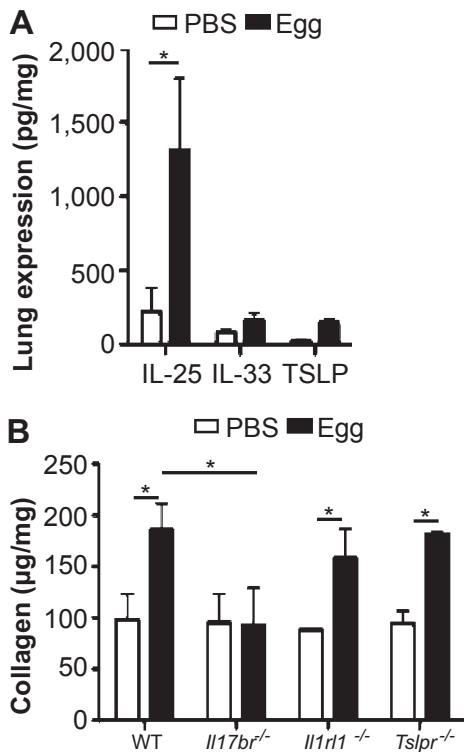

**Fig. S3.** Expression of IL-25, IL-33, and thymic stromal lymphopoietin (TSLP) in response to egg-induced pulmonary fibrosis. (A) Expression of IL-25, IL-33, and TSLP determined in the lungs of WT mice in response to egg-induced fibrosis assessed by ELISA and expressed as picogram (pg) per mg of protein. (B) Pulmonary granulomas were induced in WT-, IL-17BR (*Il17br*<sup>-/-</sup>), T1/ST2 (*T1st2*<sup>-/-</sup>), and TSLPR (*Tslpr*<sup>-/-</sup>)-deficient mice and total collagen in lung digests expressed per mg of lung protein. Data are representative of mean ± SEM (*n* = 3–4) from two individual experimental replicates (\**P* < 0.05, \*\**P* < 0.01).

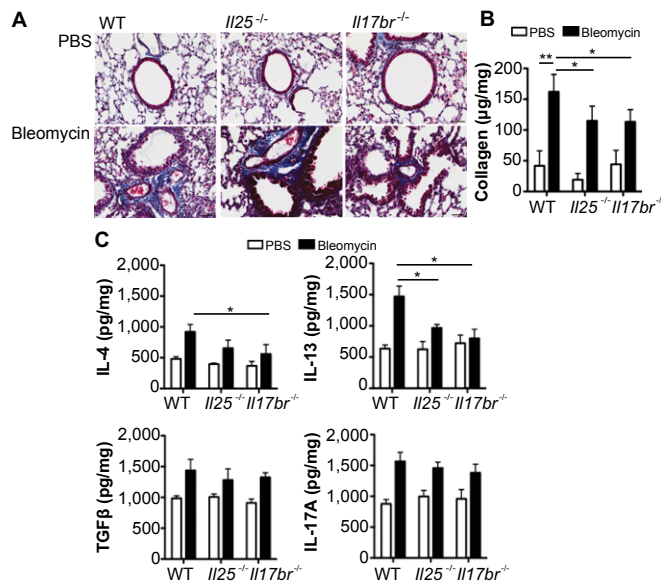

**Fig. S4.** IL-25-deficient mice have decreased pulmonary collagen deposition in bleomycin-induced pulmonary fibrosis. Pulmonary fibrosis was induced in groups of WT, *Il25*<sup>-/-</sup> and *Il17br*<sup>-/-</sup> by intratracheal injection of 0.15 U bleomycin. (A) Collagen was assayed in the lungs by histology, using Masson's Trichrome (scale, 50 µM) and by (B) quantitative analysis. (C) Levels of IL-4, IL-13, TGFβ, and IL-17A in the lung were expressed per mg of lung protein. Data are representative of mean ± SEM (*n* = 6–8) from three individual experimental replicates (\**P* < 0.05, \*\**P* < 0.01).

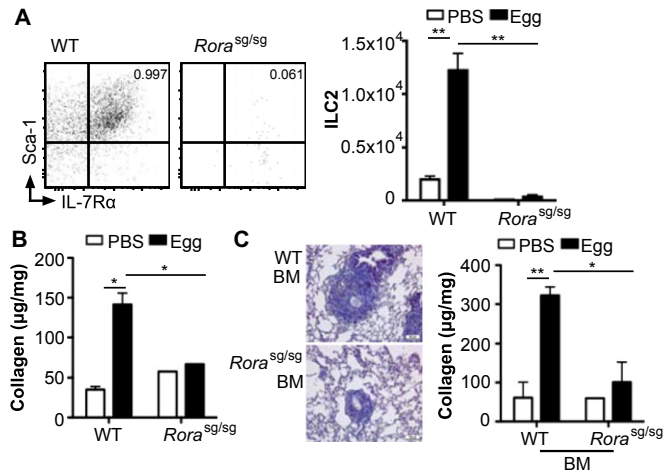

**Fig. S5.** Mice deficient in the transcription factor ROR $\alpha$  show impairment in the generation of ILC2 and pulmonary collagen deposition. (A) Frequency of ILC2 (CD3<sup>-</sup>CD4<sup>-</sup>CD8<sup>-</sup>CD19<sup>-</sup>CD11b<sup>-</sup>CD11c<sup>-</sup>Gr-1<sup>-</sup>Fc $\epsilon$ R1<sup>-</sup>F4/80<sup>-</sup>IL-7R $\alpha$ <sup>+</sup>Sca-1<sup>+</sup>) in the lung of unchallenged WT and *Rora*<sup>sg/sg</sup> mice. ILC2 expansion in the lungs (B) and pulmonary collagen deposition (C) in WT and *Rora*<sup>sg/sg</sup> mice after egg challenge. Bone marrow chimeras were generated using donor cells from WT and *Rora*<sup>sg/sg</sup> mice and after egg challenge the pulmonary collagen analyzed by histology (scale, 50  $\mu$ m) and by quantitative analysis (C). Data are representative of mean  $\pm$  SEM ( $n = 2-4$ ) from three individual experimental replicates (\* $P < 0.05$ , \*\* $P < 0.01$ ).

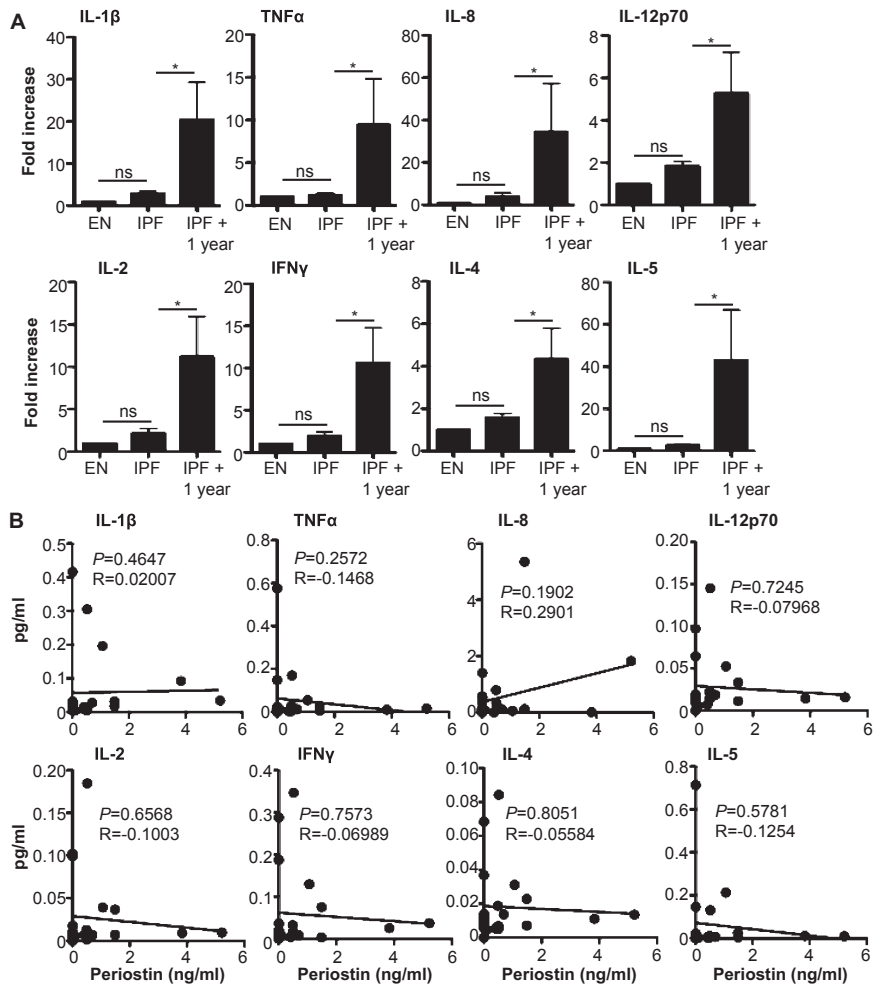

**Fig. S6.** Cytokine expression in the bronchoalveolar lavage (BAL). BAL fluid and lung tissue of idiopathic pulmonary fibrosis (IPF) patients. BAL fluid was collected from patients with IPF at diagnosis and at a 1-y follow-up (IPF + 1 y) and patients diagnosed with erythema nodosum (EN; nonprogressive patients). (A) Cytokines in BAL fluid were quantified by ELISA and expressed as fold-increase relative to EN patients. (B) Correlation between BAL fluid levels of cytokines and periostin was plotted and Pearson's correlation calculated and displayed on the graph. Data are representative of mean  $\pm$  SEM ( $n = 3$ , EN;  $n = 14$ , IPF and IPF + 1 y) (\* $P < 0.05$ , \*\* $P < 0.01$ ).

**Table S1. Characteristics and pulmonary function of IPF subjects at baseline and 12-mo follow-up**

| Demographic                   | IPF subjects       |
|-------------------------------|--------------------|
| No.                           | 14                 |
| Sex, M/F, %                   | 64/36              |
| Median age, year range        | 66 (50–75)         |
| Smoker, ever/never, %         | 73/27              |
| Physiological, baseline       |                    |
| FEV1, % predicted             | 98.7 (74.2–113)    |
| FVC1, % predicted             | 92.1 (70.7–115)    |
| FEV1/FVC1 ratio               | 81.8 (73.9–86.9)   |
| T <sub>CO</sub> , % predicted | 51.4 (30.9–67.9)   |
| Disease progression, 12 mo    |                    |
| FEV1 slope                    | –0.07 (–19.4–5.9)  |
| FVC1 slope                    | 3.10 (–19.4–8.0)   |
| T <sub>CO</sub> slope         | –4.10 (–22.4–10.6) |

Values are presented as median (range). Slope values represent the % change at 12 mo from baseline values. FEV1, forced expiratory volume in 1 s; FVC1, forced vital capacity; T<sub>CO</sub>, transfer factor–absorption of CO in one breath.
